# Supplementary material
Source: MDPI journal article supplement (https://www.mdpi.com/1661-3821/3/4/43)
Supplement: s1 [file s1]

**Table S1.** Female Testosterone Exploratory Analysis – All Timepoints. .

|                                   |     | GG (n = 9)   | PLA (n = 7)  | T     | G     | G × T |
|-----------------------------------|-----|--------------|--------------|-------|-------|-------|
| Total Testosterone (ng/dL)        | Pre | 18.44 (3.91) | 15.86 (3.39) |       |       |       |
|                                   | Wk4 | 18.83 (6.95) | 17.14 (5.55) | 0.301 | 0.551 | 0.623 |
|                                   | Wk8 | 15.78 (7.0)  | 15.86 (4.47) |       |       |       |
| Free Testosterone (ng/dL)         | Pre | 0.21 (0.09)  | 0.20 (0.06)  |       |       |       |
|                                   | Wk4 | 0.22 (0.06)  | 0.20 (0.08)  | 0.511 | 0.715 | 0.905 |
|                                   | Wk8 | 0.24 (0.19)  | 0.21 (0.07)  |       |       |       |
| Bioavailable Testosterone (ng/dL) | Pre | 5.08 (2.44)  | 4.5 (1.55)   |       |       |       |
|                                   | Wk4 | 5.53 (3.78)  | 5.01 (1.82)  | 0.465 | 0.887 | 0.439 |
|                                   | Wk8 | 4.42 (3.22)  | 4.99 (2.0)   |       |       |       |

Data are mean (standard deviation). GG: treatment group; PLA: placebo group; T: time effect p-value; G: group effect p-value; G × T: group by time interaction p-value.

**Table S2.** Female Testosterone Exploratory Analysis – Wk4 and Wk8.

|                                   |     | GG (n = 9)   | PLA (n = 7)  | T     | G     | G × T |
|-----------------------------------|-----|--------------|--------------|-------|-------|-------|
| Total Testosterone (ng/dL)        | Wk4 | 18.83 (6.95) | 17.14 (5.55) | 0.187 | 0.773 | 0.581 |
|                                   | Wk8 | 15.78 (7.0)  | 15.86 (4.47) |       |       |       |
| Free Testosterone (ng/dL)         | Wk4 | 0.22 (0.06)  | 0.20 (0.08)  | 0.366 | 0.704 | 0.842 |
|                                   | Wk8 | 0.24 (0.19)  | 0.21 (0.07)  |       |       |       |
| Bioavailable Testosterone (ng/dL) | Wk4 | 5.53 (3.78)  | 5.01 (1.82)  | 0.313 | 0.987 | 0.337 |
|                                   | Wk8 | 4.42 (3.22)  | 4.99 (2.0)   |       |       |       |

Data are mean (standard deviation). GG: treatment group; PLA: placebo group; T: time effect p-value; G: group effect p-value; G × T: group by time interaction p-value.

**Table S3.** Female Testosterone Exploratory Analysis – Pre and Wk8.

|                                   |     | GG (n = 9)   | PLA (n = 7)  | T     | G     | G × T |
|-----------------------------------|-----|--------------|--------------|-------|-------|-------|
| Total Testosterone (ng/dL)        | Pre | 18.44 (3.91) | 15.86 (3.39) | 0.323 | 0.577 | 0.323 |
|                                   | Wk8 | 15.78 (7.0)  | 15.86 (4.47) |       |       |       |
| Free Testosterone (ng/dL)         | Pre | 0.21 (0.09)  | 0.20 (0.06)  | 0.301 | 0.718 | 0.674 |
|                                   | Wk8 | 0.24 (0.19)  | 0.21 (0.07)  |       |       |       |
| Bioavailable Testosterone (ng/dL) | Pre | 5.08 (2.44)  | 4.5 (1.55)   | 0.856 | 0.995 | 0.236 |
|                                   | Wk8 | 4.42 (3.22)  | 4.99 (2.0)   |       |       |       |

Data are mean (standard deviation). GG: treatment group; PLA: placebo group; T: time effect p-value; G: group effect p-value; G × T: group by time interaction p-value.

### Body Composition Methodology

Body mass and height were measured to the nearest 0.1 kg and 0.1 cm, respectively, using a stadiometer (Seca, Chino, CA). Total and regional body composition was determined by a whole-body scan on a dual-energy x-ray absorptiometry device (DXA) (Horizon A DXA System, Hologic Inc, Marlborough, MA). Each participant was scanned by a certified technician, and the digital segmentation was determined via a computer algorithm. Fat-free mass, fat mass, body fat percentage, bone mineral content and bone density were determined for each scan. The participant was asked to wear comfortable clothing and remove any items that could attenuate the X-ray beams (this could be jewelry, items containing wire, shoes, etc.). The participant was asked to lie in a supine position with knees and elbows extended and instructed not to move for the entire duration of the scan (approximately 5 minutes). The DXA has a switching-pulse system that rapidly alternates the voltage of the X-ray generator, producing two beams of high and low energies. The

attenuated X-rays that have passed through the participant are measured sequentially with a detector situated on the scanning arm above the patient. An internal wheel corrects for any small fluctuations caused by this method of beam generation. Results from each scan were uploaded and accessed on a computer that was directly linked to the DXA device. Calibration of the densitometer on the DXA device was done against a phantom provided by the manufacturing company prior to testing. The abdominal region was delineated by an upper horizontal border located at half of the distance between the acromion processes and external end of iliac crests, a lower border determined by the external end of iliac crests and the lateral borders extending to the edge of the abdominal soft tissue. All trunk tissue within this standardized height region was selected for analysis.

**Table S4.** Body Composition All Participants.

|                                           |     | <b>GG (n = 34)</b> | <b>PLA (n = 32)</b> | <b>T</b> | <b>G</b> | <b>G × T</b> |
|-------------------------------------------|-----|--------------------|---------------------|----------|----------|--------------|
| Bone Mineral Content (kg)                 | Pre | 2.68 (0.54)        | 2.73 (0.54)         | 0.574    | 0.712    | 0.272        |
|                                           | Wk4 | 2.69 (0.54)        | 2.72 (0.53)         |          |          |              |
|                                           | Wk8 | 2.67 (0.53)        | 2.73 (0.53)         |          |          |              |
| Bone Mineral Density (g/cm <sup>2</sup> ) | Pre | 1.20 (0.12)        | 1.21 (0.11)         | 0.302    | 0.816    | 0.103        |
|                                           | Wk4 | 1.20 (0.13)        | 1.20 (0.10)         |          |          |              |
|                                           | Wk8 | 1.19 (0.13)        | 1.20 (0.10)         |          |          |              |
| Fat Mass (kg)                             | Pre | 24.22 (8.88)       | 25.45 (9.39)        | 0.283    | 0.571    | 0.839        |
|                                           | Wk4 | 24.23 (8.75)       | 25.60 (9.49)        |          |          |              |
|                                           | Wk8 | 24.41 (9.00)       | 25.66 (9.60)        |          |          |              |
| Lean Mass (kg)                            | Pre | 58.30 (15.14)      | 58.92 (14.60)       | 0.192    | 0.78     | 0.059        |
|                                           | Wk4 | 57.77 (15.24)      | 58.90 (14.53)       |          |          |              |
|                                           | Wk8 | 57.82 (15.18)      | 59.13 (14.97)       |          |          |              |
| Total Mass (kg)                           | Pre | 85.20 (17.83)      | 87.11 (17.51)       | 0.427    | 0.59     | 0.151        |
|                                           | Wk4 | 84.68 (17.90)      | 87.23 (17.23)       |          |          |              |
|                                           | Wk8 | 84.87 (18.21)      | 87.52 (17.80)       |          |          |              |
| Body Fat (%)                              | Pre | 28.64 (8.91)       | 29.41 (8.91)        | 0.101    | 0.765    | 0.628        |
|                                           | Wk4 | 28.87 (8.83)       | 29.54 (9.10)        |          |          |              |
|                                           | Wk8 | 28.99 (8.88)       | 29.54 (9.20)        |          |          |              |
| Body Mass Index (kg/m <sup>2</sup> )      | Pre | 27.90 (4.58)       | 28.35 (4.22)        | 0.339    | 0.503    | 0.104        |
|                                           | Wk4 | 27.68 (4.59)       | 28.40 (4.24)        |          |          |              |
|                                           | Wk8 | 27.73 (4.70)       | 28.77 (4.60)        |          |          |              |

GG: treatment group; PLA: placebo group; ; T: time effect p-value; G: group effect p-value; G × T: group by time interaction p-value.

**Table S5.** Body Composition Male Participants.

|                                           |     | <b>GG (n = 19)</b> | <b>PLA (n = 18)</b> | <b>T</b> | <b>G</b> | <b>G × T</b> |
|-------------------------------------------|-----|--------------------|---------------------|----------|----------|--------------|
| Bone Mineral Content (kg)                 | Pre | 2.98 (0.46)        | 3.06 (0.44)         | 0.44     | 0.619    | 0.209        |
|                                           | Wk4 | 2.98 (0.45)        | 3.04 (0.44)         |          |          |              |
|                                           | Wk8 | 2.97 (0.45)        | 3.05 (0.43)         |          |          |              |
| Bone Mineral Density (g/cm <sup>2</sup> ) | Pre | 1.25 (0.1)         | 1.25 (0.1)          | 0.556    | 0.917    | 0.218        |
|                                           | Wk4 | 1.25 (0.11)        | 1.24 (0.1)          |          |          |              |
|                                           | Wk8 | 1.25 (0.11)        | 1.25 (0.09)         |          |          |              |
| Fat Mass (kg)                             | Pre | 22.05 (8.95)       | 24.15 (8.43)        | 0.203    | 0.487    | 0.933        |
|                                           | Wk4 | 22.2 (8.74)        | 24.2 (8.69)         |          |          |              |
|                                           | Wk8 | 22.41 (9.17)       | 24.4 (8.66)         |          |          |              |
| Lean Mass (kg)                            | Pre | 69.11 (10.67)      | 70.19 (7.21)        | 0.113    | 0.606    | 0.076        |
|                                           | Wk4 | 68.46 (11.01)      | 70.08 (7.31)        |          |          |              |
|                                           | Wk8 | 68.65 (10.69)      | 70.71 (7.59)        |          |          |              |
|                                           | Pre | 94.14 (16.22)      | 97.4 (11.88)        | 0.106    | 0.443    | 0.307        |

|                                      |     |               |               |       |       |       |
|--------------------------------------|-----|---------------|---------------|-------|-------|-------|
| Total Mass (kg)                      | Wk4 | 93.65 (16.22) | 97.32 (12.0)  |       |       |       |
|                                      | Wk8 | 94.03 (16.69) | 98.15 (12.42) |       |       |       |
| Body Fat (%)                         | Pre | 22.96 (6.48)  | 24.36 (6.43)  | 0.287 | 0.532 | 0.919 |
|                                      | Wk4 | 23.31 (6.47)  | 24.4 (6.69)   |       |       |       |
|                                      | Wk8 | 23.34 (6.49)  | 24.43 (6.54)  |       |       |       |
| Body Mass Index (kg/m <sup>2</sup> ) | Pre | 28.98 (4.72)  | 29.42 (3.58)  | 0.226 | 0.678 | 0.294 |
|                                      | Wk4 | 28.81 (4.64)  | 29.41 (3.74)  |       |       |       |
|                                      | Wk8 | 28.9 (4.81)   | 29.62 (3.79)  |       |       |       |

GG: treatment group; PLA: placebo group; ; T: time effect p-value; G: group effect p-value; G × T: group by time interaction p-value.

**Table S6.** Body Composition Female Participants.

|                                           |     | GG (n = 15)   | PLA (n = 14)  | T     | G     | G × T |
|-------------------------------------------|-----|---------------|---------------|-------|-------|-------|
| Bone Mineral Content (kg)                 | Pre | 2.31 (0.38)   | 2.31 (0.31)   | 0.998 | 0.893 | 0.994 |
|                                           | Wk4 | 2.31 (0.38)   | 2.32 (0.3)    |       |       |       |
|                                           | Wk8 | 2.3 (0.38)    | 2.32 (0.3)    |       |       |       |
| Bone Mineral Density (g/cm <sup>2</sup> ) | Pre | 1.13 (0.12)   | 1.15 (0.09)   | 0.933 | 0.449 | 0.977 |
|                                           | Wk4 | 1.13 (0.12)   | 1.14 (0.08)   |       |       |       |
|                                           | Wk8 | 1.12 (0.11)   | 1.14 (0.08)   |       |       |       |
| Fat Mass (kg)                             | Pre | 26.96 (8.27)  | 27.13 (10.6)  | 0.868 | 0.916 | 0.513 |
|                                           | Wk4 | 26.8 (8.35)   | 27.41 (10.48) |       |       |       |
|                                           | Wk8 | 26.94 (8.4)   | 27.29 (10.8)  |       |       |       |
| Lean Mass (kg)                            | Pre | 44.6 (5.84)   | 44.43 (6.19)  | 0.234 | 0.969 | 0.471 |
|                                           | Wk4 | 44.22 (6.31)  | 44.53 (6.16)  |       |       |       |
|                                           | Wk8 | 44.1 (5.98)   | 44.24 (5.9)   |       |       |       |
| Total Mass (kg)                           | Pre | 73.87 (12.83) | 73.87 (14.52) | 0.497 | 0.921 | 0.288 |
|                                           | Wk4 | 73.33 (13.03) | 74.26 (14.07) |       |       |       |
|                                           | Wk8 | 73.27 (12.86) | 73.84 (13.98) |       |       |       |
| Body Fat (%)                              | Pre | 35.83 (5.85)  | 35.91 (7.37)  | 0.989 | 0.952 | 0.997 |
|                                           | Wk4 | 35.92 (5.87)  | 36.14 (7.46)  |       |       |       |
|                                           | Wk8 | 36.15 (5.77)  | 36.11 (7.96)  |       |       |       |
| Body Mass Index (kg/m <sup>2</sup> )      | Pre | 25.61 (4.17)  | 26.98 (4.69)  | 0.86  | 0.652 | 0.714 |
|                                           | Wk4 | 27.68 (4.59)  | 27.12 (4.62)  |       |       |       |
|                                           | Wk8 | 26.24 (4.24)  | 27.68 (5.42)  |       |       |       |

GG: treatment group; PLA: placebo group; ; T: time effect p-value; G: group effect p-value; G × T: group by time interaction p-value.
